## 1 **Low rate of somatic mutations in a long-lived oak tree**

2 Namrata Sarkar<sup>1,2,3,†</sup>, Emanuel Schmid-Siegert<sup>4,†</sup>, Christian Iseli<sup>4,†</sup>, Sandra Calderon<sup>4</sup>,  
3 Caroline Gouhier-Darimont<sup>5</sup>, Jacqueline Chrast<sup>1</sup>, Pietro Cattaneo<sup>5</sup>, Frédéric Schütz<sup>1</sup>, Laurent  
4 Farinelli<sup>6</sup>, Marco Pagni<sup>4</sup>, Michel Schneider<sup>7</sup>, Jérémie Voumard<sup>8</sup>, Michel Jaboyedoff<sup>8</sup>,  
5 Christian Fankhauser<sup>1\*</sup>, Christian S. Hardtke<sup>5\*</sup>, Laurent Keller<sup>2\*</sup>, John R. Pannell<sup>2\*</sup>,  
6 Alexandre Reymond<sup>1\*</sup>, Marc Robinson-Rechavi<sup>2,3\*</sup>, Ioannis Xenarios<sup>1,4,7\*</sup> and Philippe  
7 Reymond<sup>5\*</sup>

8

9 <sup>1</sup>Center for Integrative Genomics, University of Lausanne, 1015 Lausanne, Switzerland,

10 <sup>2</sup>Department of Ecology and Evolution, University of Lausanne, 1015 Lausanne, Switzerland

11 <sup>3</sup>Evolutionary Bioinformatics Group, Swiss Institute of Bioinformatics, 1015 Lausanne,

12 Switzerland, <sup>4</sup>Vital-IT Competence Center, Swiss Institute of Bioinformatics, 1015 Lausanne,

13 Switzerland, <sup>5</sup>Department of Plant Molecular Biology, University of Lausanne, 1015

14 Lausanne, Switzerland, <sup>6</sup>Fasteris SA, 1228 Plan-les-Ouates, Switzerland, <sup>7</sup>Swiss-Prot group,

15 Swiss Institute of Bioinformatics, 1211 Geneva, Switzerland, <sup>8</sup>Risk Analysis Group, Institute

16 of Earth Sciences, University of Lausanne, 1015 Lausanne, Switzerland, <sup>†</sup>These authors

17 contributed equally.

18

19 \*Correspondence: christian.fankhauser@unil.ch, christian.hardtke@unil.ch,

20 laurent.keller@unil.ch, john.pannell@unil.ch, alexandre.reymond@unil.ch, marc.robinson-

21 rechavi@unil.ch, ioannis.xenarios@unil.ch, philippe.reymond@unil.ch

22

23 **Because plants do not possess a proper germline, deleterious somatic mutations can be**  
24 **passed to gametes and a large number of cell divisions separating zygote from gamete**  
25 **formation in long-lived plants may lead to many mutations. We sequenced the genome**  
26 **of two terminal branches of a 234-year-old oak tree and found few fixed somatic single-**  
27 **nucleotide variants (SNVs), whose sequential appearance in the tree could be traced**  
28 **along nested sectors of younger branches. Our data suggest that stem cells of shoot**  
29 **meristems are robustly protected from accumulation of mutations in trees.**

30

31 Accumulation of deleterious mutations is a fundamental parameter in plant ageing and  
32 evolution. Because the pedigree of cell division that generates somatic tissue is poorly  
33 understood, the number of cell divisions that separate zygote from gamete formation is  
34 difficult to estimate; this number is expected to be particularly large in trees and could in  
35 theory lead to a large number of DNA replication errors<sup>1-3</sup>. Tree architecture is determined by  
36 the modular growth of apical meristems, which contain stem cells. These cells divide and  
37 produce progenitor cells that undergo division, elongation and differentiation to form a  
38 vegetative shoot, the branch. Axillary meristems are formed at the base of leaf axils and are  
39 responsible for the emergence of side branches. They are separated from apical meristems by  
40 elongating internodes. In oak, early and repeated growth cessation of terminal apical  
41 meristems leads to a branching pattern originating from such axillary meristems. In turn,  
42 axillary meristems grow out and produce secondary axillary meristems. This process is  
43 reiterated indeterminately to produce highly ramified trees of large stature, resulting in  
44 thousands of terminal ramets<sup>4</sup>. The cumulative number of cell divisions separating meristems  
45 determines the rate of genetic aging and the potential accumulation of somatic mutations. To  
46 detect such mutations, we selected an iconic old oak tree (*Quercus robur*) known as the  
47 ‘Napoleon Oak’ by the academic community of the University of Lausanne. The tree was 22  
48 years old when, on May 12, 1800, Napoleon Bonaparte and his troops crossed what is now

49 the Lausanne University campus, on their way to conquer Italy. At the time of sample harvest  
50 for our study, the dividing apical meristems of this magnificent tree (Figure 1, Supplementary  
51 Figure 1) had been exposed for 234 years to potential environmental mutagens, such as UV  
52 and radioactive radiation.

53 To identify fixed somatic variants (i.e., those present in an entire sector of the  
54 Napoleon Oak) and to reconstruct their origin and distribution among branches, we collected  
55 26 leaf samples from different locations on the tree. We first sequenced the genome from  
56 leaves sampled on terminal ramets of one lower and one upper branch of the tree. We then  
57 used a combination of short-read Illumina and single-molecule real-time (SMRT, Pacific  
58 Biosciences) sequencing to generate a *de novo* assembly of the oak genome. After removing  
59 contigs <1000bp, we established a draft sequence of ca. 720 megabases (Mb) at a coverage of  
60 ca. 70X, with 85,557 scaffolds and a N50 length of 17,014. Our sequence is thus in broad  
61 agreement with the published estimated genome size of 740 Mbp<sup>5</sup>. The oak genome is  
62 predicted to encode 49,444 predicted protein-coding loci (Supplementary Table 1).

63 We used two approaches to identify SNVs (single-nucleotide variants) between the  
64 sequenced genomes of the two terminal branches. First, we aligned Illumina paired-reads on  
65 the repeat-masked genome in combination with the GATK<sup>6</sup> variant caller. This allowed us to  
66 establish a list of 3,488 potential SNV candidates with a high confidence score. From this list,  
67 1,536 SNVs were experimentally tested by PCR-seq and only seven could be confirmed (see  
68 Methods). Second, we used fetchGWI<sup>7</sup> to map read pairs to the non-masked genome. We  
69 were able to call 5,330 potential SNVs from the mapped reads using a simple read pileup  
70 process. Further analysis identified 82 putatively variable positions, including the seven  
71 already identified using the repeat-masked genome analysis described above (see Methods).  
72 Ten of the remaining 75 candidates from the second approach were confirmed by PCR-seq,  
73 increasing the total number of confirmed SNVs separating the two genomes to 17 (Figure 1,  
74 Supplementary Table 2), which were further confirmed by Sanger sequencing. Based on a

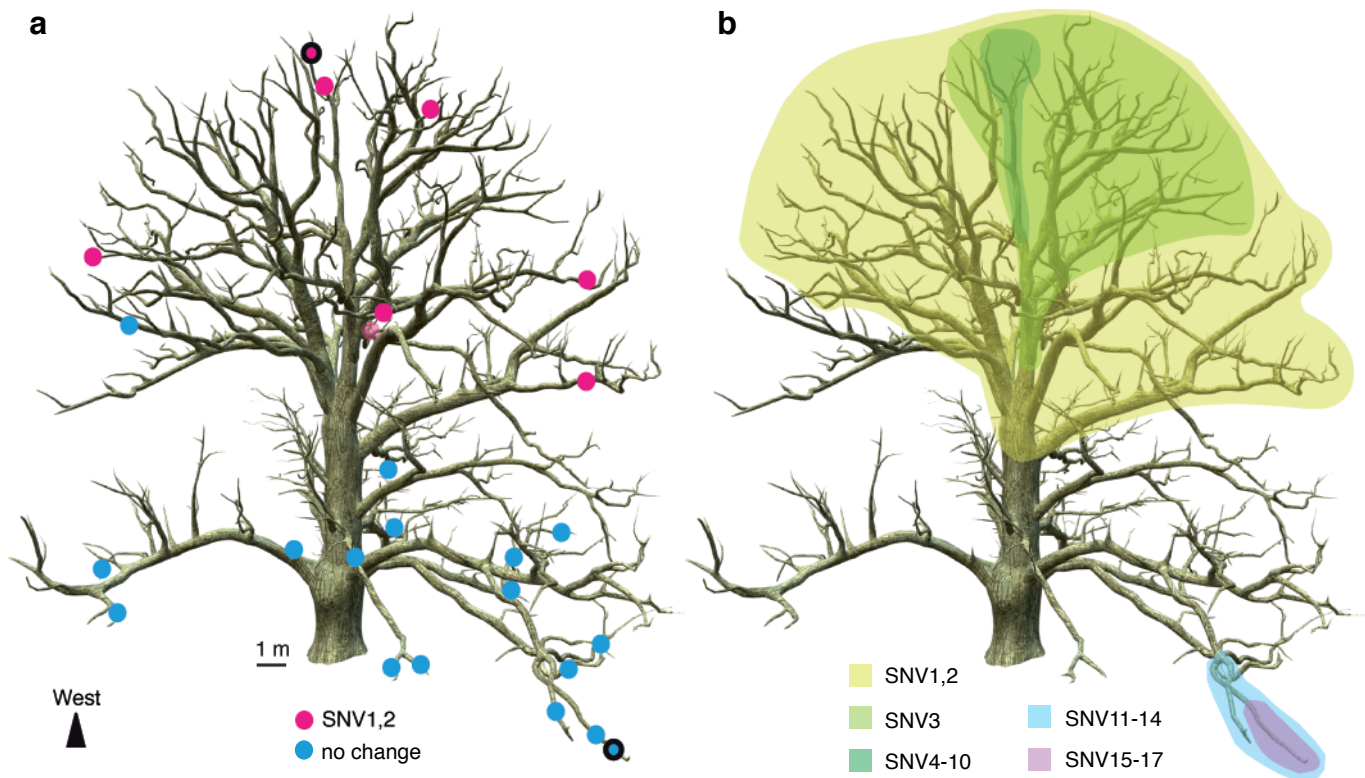

**Figure 1 | Distribution of somatic mutations in the Napoleon oak.** **a**, The genome of two leaf samples (outlined dots) was sequenced to identify single-nucleotide variants (SNV). 17 SNVs were confirmed and analysed in 26 other leaf samples to map their origin. A reconstructed image of the Napoleon Oak shows similar location of two SNVs (magenta dots) on the tree. Blue dots represent genotypes that are non-mutant for these SNVs. Three non-mutant samples are not visible on this projection. Location of other SNVs can be found in Supplementary Figure 2. **b**, Location of all identified SNVs. Sectors of the tree containing each group of SNVs are represented by different colours.

75 conservative estimate, we are likely to have missed no more than 18 further such sites (17  
76 candidates and 1 false negative, see Supplementary Methods).

77 All 17 confirmed SNVs were heterozygous, as expected for novel somatic mutations.  
78 Intriguingly, two SNVs were found on the same contig, separated by only 12 bp  
79 (Supplementary Table 2). Sixteen SNVs occurred in introns or non-coding sequences that are  
80 probably neutral. The remaining one (SNV1), which occurred in a large sector of the tree,  
81 generates an arginine-to-glycine conversion in a putative E3-ubiquitin ligase (Supplementary  
82 Table 2). The functional impact of exchanging a positively charged arginine with a non-  
83 charged and smaller glycine residue is unknown and deserves further analysis.

84 Having confidently established 17 SNVs, we then assessed their occurrence  
85 throughout the tree. We used Sanger sequencing to genotype the remaining 24 terminal  
86 branches sampled from other parts of the tree and checked for the presence of each SNV.  
87 SNVs were found in different sectors of the tree in a nested hierarchy that clearly indicates  
88 the accumulation of mutations along branches during development (Figure 1, Supplementary  
89 Figure 2). These results both provide independent confirmation of the originally identified  
90 SNVs, and demonstrate their gradual, nested appearance and fixation in developmentally  
91 connected branches during growth of the oak tree. Thus, while the exact ontogeny of the  
92 Napoleon Oak may be difficult to reconstruct, our SNV analysis generated a nested set of  
93 lineages supported by derived mutations, analogous to a phylogenetic tree.

94 The spontaneous mutation rate in plants has been estimated to range from  $5 \times 10^{-9}$  to  
95  $30 \times 10^{-9}$  substitutions/site/generation, based on mutations accumulated during divergence  
96 between monocots and dicots<sup>8</sup>. Values for mutation accumulation lines of *Arabidopsis*  
97 *thaliana* maintained in the laboratory range between  $7.0$  and  $7.4 \times 10^{-9}$ , which corresponds to  
98  $\sim 1$  mutation/genome/generation<sup>9,10</sup>. *Arabidopsis* is an annual plant that reaches  
99 approximately 30 cm in height before producing seeds. In contrast, the physical distance  
100 traced along branches between the terminal branches we sequenced for the Napoleon Oak is

101 about 40 m (Figure 1). Assuming similar cell sizes between oak and *Arabidopsis*, there  
102 should have been about 133 times more mitotic divisions separating the extremes of somatic  
103 lineages in Napoleon Oak than in *Arabidopsis* (4,000 cm/ 30 cm). Under the assumption that  
104 the per-generation mutation rate is correlated with the number of mitotic divisions from  
105 zygote to gametes of the next generation<sup>1,11</sup>, and given the ~6-fold larger oak genome, we  
106 thus initially estimated that the number of mutations/genome/generation rate should be ~800-  
107 fold higher (133 X 6) for the Napoleon Oak than for *Arabidopsis*, i.e. ~800 SNVs/Napoleon  
108 Oak genome. This value is much higher than the 17 SNVs we actually found, even under the  
109 conservative assumption that we missed 18 other SNVs from the list of potential variants.  
110 Our original hypothesis is thus not supported by the data and another mechanism has to be  
111 invoked.

112 Classical studies of shoot apical meristem organization have reported that the most  
113 distal zone has a significantly lower rate of cell division than more basal regions of the apex,  
114 and might therefore be relatively protected from replication errors<sup>12,13</sup>. In a recent study that  
115 followed the fate of dividing cells in the apical meristems of *Arabidopsis* and tomato, Burian  
116 et al.<sup>14</sup> showed that an unexpectedly low number of divisions separate apical from axillary  
117 meristems. In these herbaceous plants, axillary meristems are separated from apical meristem  
118 stem cells by seven to nine cell divisions, with internode growth occurring through the  
119 division of cells behind the meristem. The number of cell divisions between early embryonic  
120 stem cells and terminal meristems thus depends more on the number of branching events than  
121 on absolute plant size. Burian et al.<sup>14</sup> postulated that if the same growth pattern described  
122 above for *Arabidopsis* and tomato applies to trees, their somatic mutation rate might be much  
123 lower than is commonly thought, and the majority of fixed mutations should be found in  
124 relatively small sectors as nested sets of mutations. Napoleon Oak's apical meristems are of  
125 similar diameters to those of tomato<sup>14</sup> (Supplementary Figure 3) and show similar ontogeny.  
126 It thus seems reasonable to suppose that the growth pattern described in *Arabidopsis* and

127 tomato is quite general in flowering plants and might also apply to long-lived trees. The low  
128 number of SNVs and their nested appearance in sectors of the Napoleon Oak are thus  
129 consistent with hypotheses proposed in Burian et al.<sup>14</sup>.

130 Mutations accumulate with age, irrespective of plant stature, and long-term exposure  
131 to UV radiation contributes to such changes. For the Napoleon Oak, the type of observed  
132 SNVs were mostly G:C→A:T transitions, indicative of UV-induced mutagenesis (see  
133 Supplementary Discussion). However, oaks protect their meristems in buds under multi-  
134 layered leaf-like structures (Supplementary Figure 3), potentially reducing the incidence of  
135 UV mutagenesis. The relatively low somatic mutation rate implied by our data may thus be  
136 explained by the protective nature of oak bud morphology as well as by the pattern of cell  
137 division predicted by Burian et al.<sup>14</sup>. Our results also suggest that mutations due to replication  
138 errors in long-lived plants may be less important than environmentally induced mutations. In  
139 this context, it is noteworthy that there was no evidence for an expansion of DNA-repair  
140 genes in the oak genome compared to *Arabidopsis* (Supplementary Table 3).

141 To our knowledge, only two examples of functional mosaicism have been reported in  
142 trees, a low incidence that might be attributable to the low somatic mutation rate that we  
143 report. Although most non-neutral mutations should be maladaptive, eucalyptus trees have  
144 been observed with a few branches that are biochemically distinct from the rest of the canopy  
145 and have become resistant to Christmas beetle defoliation<sup>15,16</sup>. Functionally relevant somatic  
146 mutations, such as SNV1 in our study, may thus occasionally contribute to adaptive evolution  
147 if transferred to the fruits, but will more typically increase the genetic load of a population,  
148 with implications for inbreeding depression and mating-system evolution (Supplementary  
149 Discussion).

150 Our data give an unprecedented view on the limited role played by somatic mutations  
151 in a long-lived organism, and support the view that stem cells in trees, although vulnerable to  
152 environment-induced and replication-induced mutations, are probably quite well protected

153 from them. Consistent with this finding, a recent study in *Arabidopsis* has shown that the  
154 number of cell divisions from germination to gametogenesis is independent of life span and  
155 vegetative growth<sup>17</sup>. Future studies on different tree species and older specimens are needed  
156 to test the generality of our study. This work also illustrates the potential for analyses of  
157 multiple genomes from single individuals, which throw exciting new light on the rate,  
158 distribution and potential impact of somatic mutations in both plant and animal tissues<sup>18,19</sup>.

159

## 160 **Methods**

161 **Materials and genome sequencing.** Leaves were collected in April 2012 from the terminal  
162 part of a lower (sample 0) and an upper branch (sample 66) of the Napoleon Oak (*Q. robur*)  
163 on the Lausanne University Campus (Switzerland, 46°31'18.9"N 6°34'44.5"E). The age of the  
164 tree was estimated by a tree ring analysis from a sample taken at the basis of the trunk  
165 (Laboratoire Romand de Dendrochronologie, 1510 Moudon, Switzerland). DNA from the  
166 two samples was extracted and the genome sequenced. Paired-end sequencing libraries with  
167 insert size of 400 bp were constructed for each DNA sample according to the manufacturer's  
168 instructions. Then, 100 bp paired-reads were generated on Illumina HiSeq 2000 at Fasteris  
169 ([www.fasteris.com](http://www.fasteris.com)). In addition, 3 kb mate-pair libraries from sample 0 were constructed and  
170 sequenced with single-molecule real-time (SMRT) technology according to the  
171 manufacturer's instructions (Pacific Biosciences). Short reads were combined with PacBio  
172 reads to assemble a reference genome (Supplementary Methods).

173

174 **SNV identification.** We used two different methods to identify SNVs (see flowchart,  
175 Supplementary Figure 4). In the first one, Illumina reads (278,547,120 and 278,651,792 for  
176 sample 0 and 66, respectively) were aligned to the masked (RepeatMasker, v4.05) *de novo*  
177 assembly with Bowtie2 (v2.2.2, [https://sourceforge.net/projects/bowtie-](https://sourceforge.net/projects/bowtie-bio/files/bowtie2/2.2.2)  
178 [bio/files/bowtie2/2.2.2](https://sourceforge.net/projects/bowtie-bio/files/bowtie2/2.2.2)) using default parameters. GATK<sup>6</sup> v2.5.2 was used for local



179 realignment and variant calling using standard hard filtering parameters according to GATK  
180 Best Practices recommendations<sup>20</sup>. Prior to variant calling, each sample was screened for  
181 duplicates using PICARD tools (<http://broadinstitute.github.io/picard/> v2.9.0,  
182 MarkDuplicates). Variants with confidence score  $\geq 50$  were retained further. We identified  
183 1,832,554 heterozygous sites common to both samples, as well as 314,865 putative  
184 differences between sample 0 and 66 (165,489 sites predicted to be homozygous on sample 0  
185 and heterozygous on sample 66 and 149,376 homozygous on sample 66 and heterozygous on  
186 sample 0). The distribution of the confidence scores of the 1,832,554 heterozygous sites  
187 common to both samples was a superposition of a Gaussian distribution, peaking at 910,  
188 possibly representing true positives, and of an exponential distribution, possibly representing  
189 the decreasing number of false positives with regard to increasing confidence score.  
190 Importantly, the distribution of scores of the sites with putative differences between samples  
191 was an exponential distribution of very low values, similar to the potential false positives of  
192 shared heterozygote sites. We thus hypothesized that sites that are truly different between  
193 samples 0 and 66 were unlikely to be present at sites with a confidence score below 300.  
194 From 3,488 putative SNVs with a confidence score  $\geq 300$  on the heterozygous sites and  $\geq 200$   
195 on homozygous sites, we selected 1,536 SNVs for validation by PCR-seq (Supplementary  
196 Methods). We identified only 7 true SNVs that were further confirmed by Sanger sequencing.  
197 This low rate is consistent with the expectation from the distribution of GATK scores for  
198 these sites.

199 In the second method, Illumina reads of samples 0 and 66 were mapped against the  
200 non-masked oak genome assembly. The genome was 719,779,348 bp long, but 69,130,634  
201 (9.52%) of those nucleotides were gaps and were discarded, leaving an actual search space of  
202 650,648,714 bp. Of the latter, 458,143,725 nucleotides with a read coverage  $\geq 8$  in both  
203 samples were analysed further. The mapping process was performed at the read pair level by  
204 the genome mapping tool, fetchGWI<sup>7</sup>, followed by a detailed sequence alignment tool,

205 align0<sup>21</sup>. Potential SNVs were called from the mapped reads by a simple read pileup process  
206 followed by detection of positions where the pileup shows variations with respect to the  
207 reference genome; this produced a list of 5,330 positions. Those positions were browsed  
208 through a local adaptation of the samtools pileup browser<sup>22</sup> to evaluate the quality of the  
209 mapping in the surrounding region and to discriminate between well-assembled high-quality  
210 regions with two alleles per sample, or low complexity and possibly badly assembled  
211 repeated regions. Criteria for selection were  $\geq 8$  reads in each orientation (see above); 100%  
212 homozygosity site for one sample and at least 30% minor allele frequency for the other  
213 sample with variants in both orientations; and coherent sequence  $\pm 50$  bp from variant site.  
214 This manual process led to the selection of 82 putative variable positions, including the seven  
215 already identified. Upon experimental validation, 10 of the remaining 75 candidates were  
216 confirmed by PCR-seq and Sanger sequencing. The Food and Drug Administration (FDA)  
217 has evaluated this approach in an effort to assess, compare, and improve techniques used in  
218 DNA testing on human genome variation analysis  
219 (<https://precision.fda.gov/challenges/consistency>). Within this frame, our method reached a  
220 F-score (F-score evaluates precision and recall) over 95% comparable to other identifiers like  
221 BWA coupled with GATK.

222

223 **SNV Genotyping.** Leaf DNA from different locations on the tree was prepared and amplified  
224 using primers located 100-150 bp away from the 17 confirmed SNVs (Supplementary Table  
225 4). Amplicons were then subjected to Sanger sequencing.

226

227 **Data availability.** All Illumina reads and SMRT sequences have been deposited in GenBank  
228 under accession BioProject PRJNA327502.

229

230

## 231 References

- 232 1. Scofield, D.G. & Schultz, S.T. Mitosis, stature and evolution of plant mating systems:  
233 low- $\Phi$  and high- $\Phi$  plants. *Proc. Royal Soc. London B: Biol. Sci.* **273**, 275–282 (2006).
- 234 2. Ally., D., Ritland, K. & Otto, S.P. Aging in a long-lived clonal tree. *PLoS Biol.* **8**,  
235 e1000454 (2010).
- 236 3. Bobiwash, K., Schultz, S.T. & Schoen, D.J. Somatic deleterious mutation rate in a  
237 woody plant: estimation from phenotypic data. *Heredity* **111**, 338–344 (2013).
- 238 4. Millet, J. L'architecture des arbres des régions tempérées: son histoire, ses concepts, ses  
239 usages. *MultiMondes ed.*, 397 pp (2012).
- 240 5. Plomion, C. *et al.* Decoding the oak genome: public release of sequence data, assembly,  
241 annotation and publication strategies. *Mol. Ecol. Resour.* **16**, 254–265 (2016).
- 242 6. McKenna, A. *et al.* The genome analysis toolkit: a MapReduce framework for  
243 analyzing next-generation DNA sequencing data. *Genome Res.* **20**, 1297–303 (2010).
- 244 7. Iseli, C., Ambrosini, G., Bucher, P. & Jongeneel, C.V. Indexing strategies for rapid  
245 searches of short words in genome sequences. *PLoS One* **2**, e579 (2007).
- 246 8. Wolfe, K.H., Li, W.H. & Sharp, P.M. Rates of nucleotide substitution vary greatly  
247 among plant mitochondrial, chloroplast, and nuclear DNAs. *Proc. Natl. Acad. Sci. USA*  
248 **84**, 9054–9058 (1987).
- 249 9. Ossowski, S. *et al.* The rate and molecular spectrum of spontaneous mutations in  
250 *Arabidopsis thaliana*. *Science* **327**, 92–94 (2010).
- 251 10. Yang, S. *et al.* Parent–progeny sequencing indicates higher mutation rates in  
252 heterozygotes. *Nature* **523**, 463–467 (2015).
- 253 11. Scofield, D.G. Medial pith cells per meter in twigs as a proxy for mitotic growth rate  
254 ( $\Phi/m$ ) in the apical meristem. *Am. J. Bot.* **93**, 1740–1747 (2006).
- 255 12. Romberger, J.A., Hejnowicz, Z. & Hill, J.F. Plant structure: function and development.  
256 *Springer-Verlag ed.*, 524 pp (1993).
- 257 13. Kwiatkowska, D. Flowering and apical meristem growth dynamics. *J. Exp. Bot.* **59**,  
258 187–201 (2008).
- 259 14. Burian, A., Barbier de Reuille, P. & Kuhlemeier, C. Patterns of stem cell divisions  
260 contribute to plant longevity. *Curr. Biol.* **26**, 1385–1394 (2016).
- 261 15. Edwards, P.B., Wanjura, W.J., Brown, W.V. & Dearn, J.M. Mosaic resistance in plants.  
262 *Nature* **347**, 434 (1990).
- 263 16. Padovan, A., Lanfear, R., Keszei, A., Foley, W.J. & Külheim, C. Differences in gene  
264 expression within a striking phenotypic mosaic *Eucalyptus* tree that varies in  
265 susceptibility to herbivory. *BMC Plant Biol.* **13**, 29 (2013).
- 266 17. Watson, J.M. *et al.* Germline replications and somatic mutation accumulation are  
267 independent of vegetative life span in *Arabidopsis*. *Proc. Natl. Acad. Sci. USA* **113**,  
268 12226–12231 (2016).
- 269 18. Behjati, S. *et al.* Genome sequencing of normal cells reveals developmental lineages  
270 and mutational processes. *Nature* **513**, 422–425 (2014).
- 271 19. Lodato, M.A. *et al.* Somatic mutation in single human neurons tracks developmental  
272 and transcriptional history. *Science* **350**, 94–98 (2015).
- 273 20. Van der Auwera, G.A. *et al.* From FastQ data to high-confidence variant calls: the  
274 genome analysis toolkit best practices pipeline. *Curr. Protocols Bioinfo.* **43**, 11.10.1–  
275 11.10.33 (2013).
- 276 21. Myers, E.W. & Miller, W. Optimal alignments in linear space. *Comput. Appl. Biosci.* **4**,  
277 11–17 (1988).
- 278 22. Li, H. *et al.* The Sequence alignment/map (SAM) format and SAMtools.  
279 *Bioinformatics* **25**, 2078–9 (2009).

280

281

## 282 **Acknowledgements**

283 This work was funded by the University of Lausanne through a supportive grant from the  
284 University rectorate and by the Swiss National Science Foundation (Agora Grant  
285 CRAGI3\_145652). The Pacific Biosciences RS II sequencing was performed at the Lausanne  
286 Genomic Technologies Facility (GTF). The purchase of the GTF's RS II instrument was  
287 financed in part by the *Loterie Romande* through the *Fondation pour la Recherche en*  
288 *Médecine Génétique*. We thank Keith Harshman, Johann Weber, and Mélanie Dupasquier  
289 from the GTF for sequencing. We thank Cris Kuhlemeier for sharing unpublished results,  
290 Jean Tercier for tree-ring analysis, Woodtli+Leuba SA for sample collection, Nicolas Guex  
291 for advice on SNV calling and Jean-Jacques Strahm and Marco Bonetti for providing oak  
292 images.

293

## 294 **Author contributions**

295 L. F. sequenced the genome. E.S.-S., S.C., M.P. assembled and annotated the genome. N.S.,  
296 E.S.-S., C.I. identified SNVs. C.G.-D., J.C. extracted DNA and confirmed SNVs. E.S.-S.,  
297 M.R.-R. analyzed genome duplication. P.C. produced cross-sections of oak apical meristems.  
298 M. S. established a list of DNA repair genes. F. S. provided statistical help with the analyses.  
299 J.V., M.J. produced a 3D model of the oak tree. C.H., C.F., L.K., I.X., M.R.-R., J.P., A.R.,  
300 P.R. conceived the project and wrote the manuscript.

301

## 302 **Additional information**

303 Supplementary information is available for this paper.

304 Correspondence and requests for materials should be addressed to P. R.

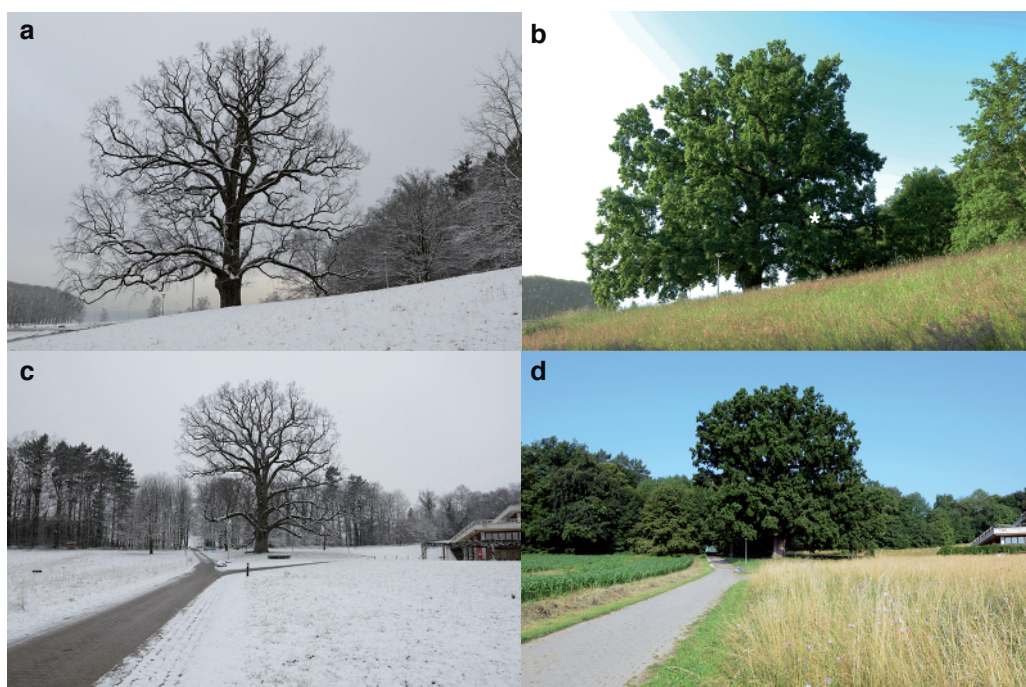

**Supplementary Figure 1 | Napoleon Oak.** Photographs of the Napoleon Oak on the Lausanne University campus taken in winter and summer. **a, b**, South view. **c, d**, North-West view.

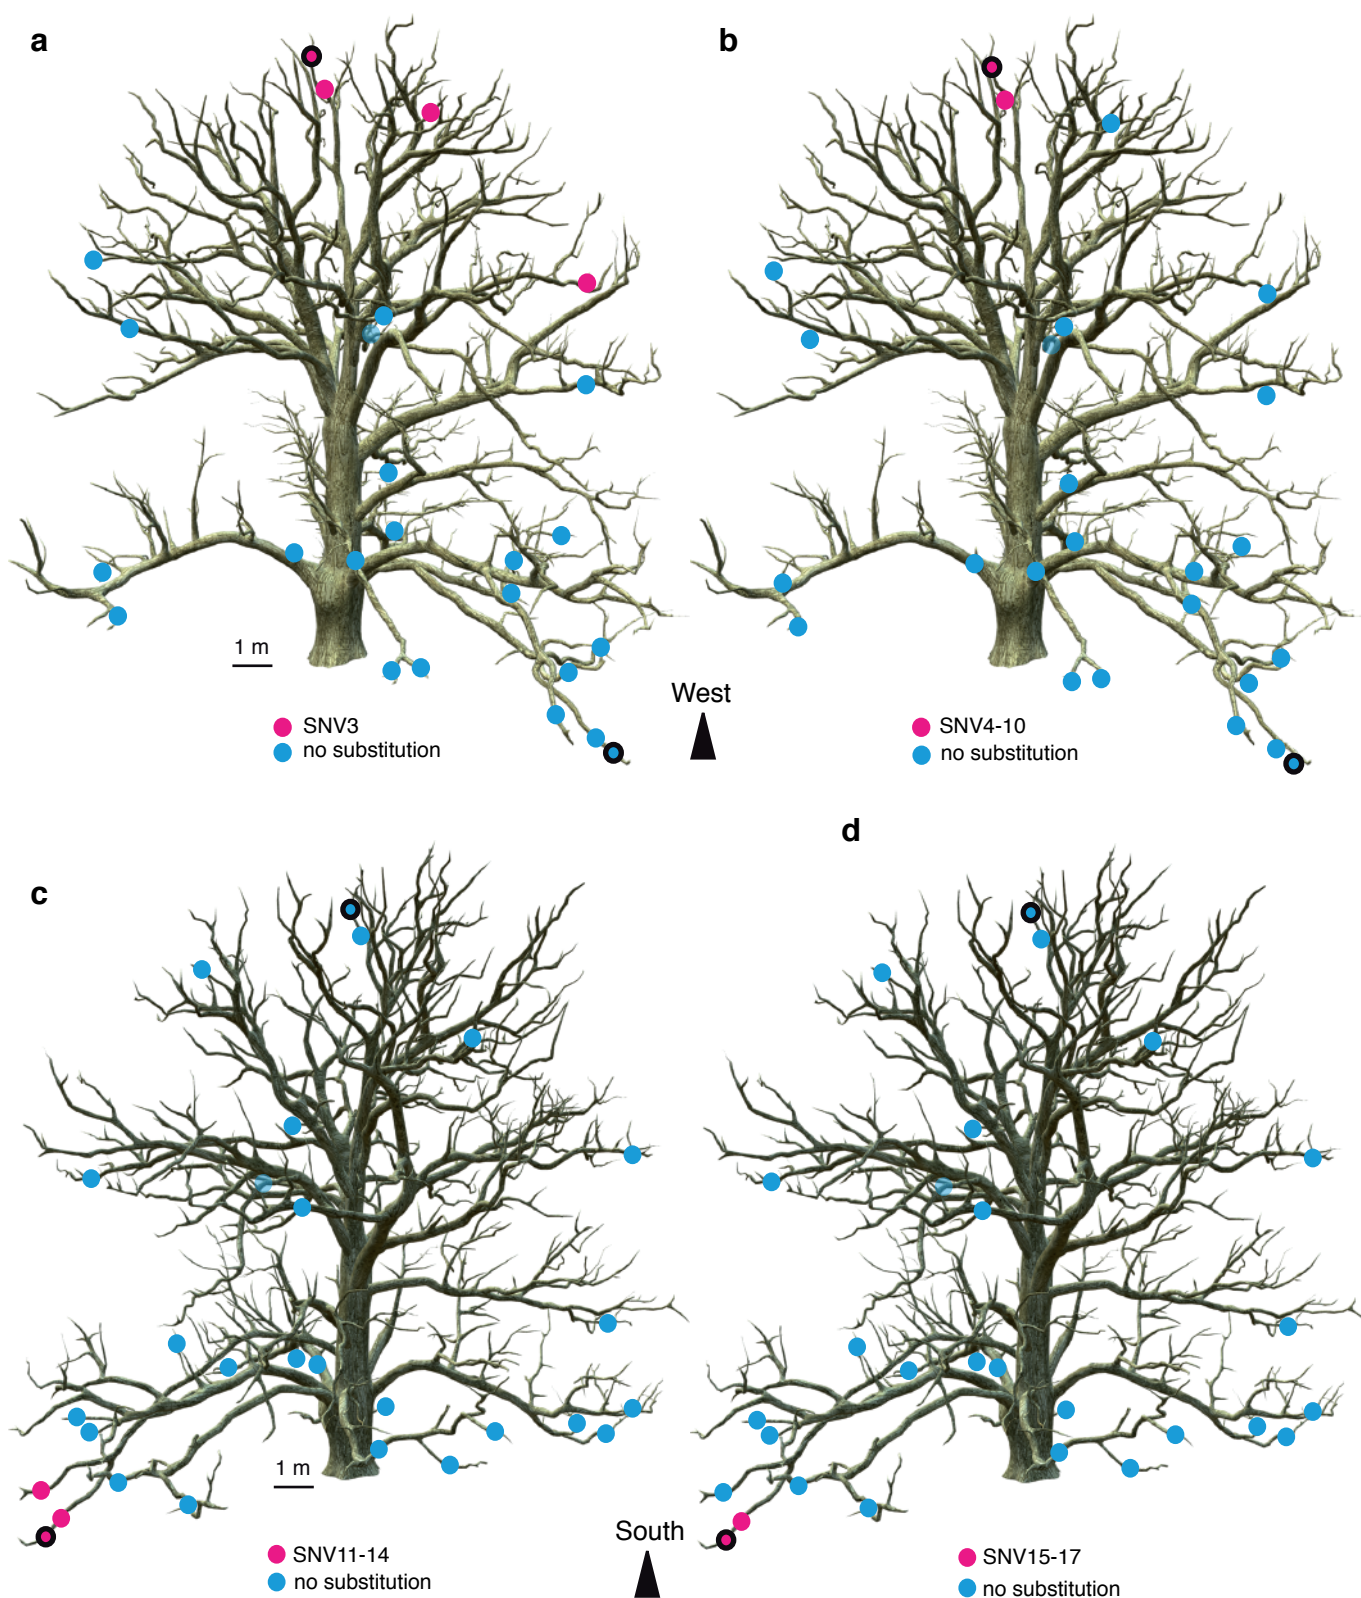

**Supplementary Figure 2 | Distribution of somatic mutations in the Napoleon Oak.** The genome of two leaf samples (outlined dots) was sequenced to identify single-nucleotide variants (SNV). 17 SNVs were confirmed and analysed in 26 other leaf samples to map their origin. **a-d**, Reconstructed images of the Napoleon Oak show the location of different SNVs (magenta dots) on the tree. Blue dots represent genotypes that are non-mutant for these SNVs.

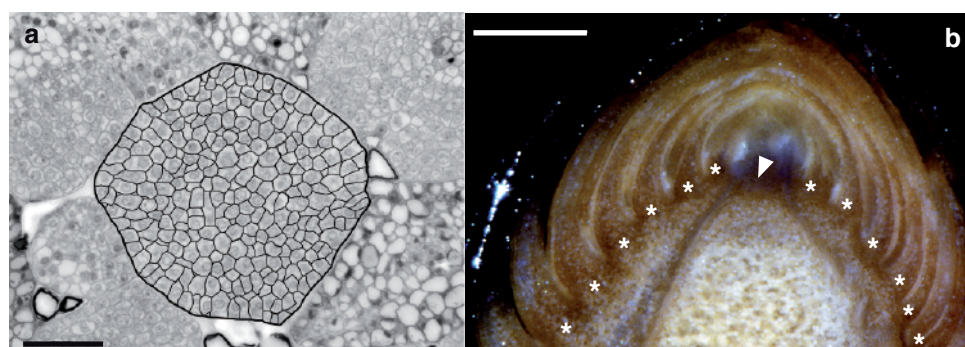

**Supplementary Figure 3 | Napoleon Oak apical meristem.** **a**, Cross-section of an apical meristem. Meristematic cells are delineated. Surrounding cells belong to leaf-like structures surrounding the meristem. Scale bar, 50  $\mu$ m. **b**, Longitudinal section of an apical bud. Apical meristem (arrowhead) is surrounded by leaf-like structures (stars). Scale bar, 500  $\mu$ m.

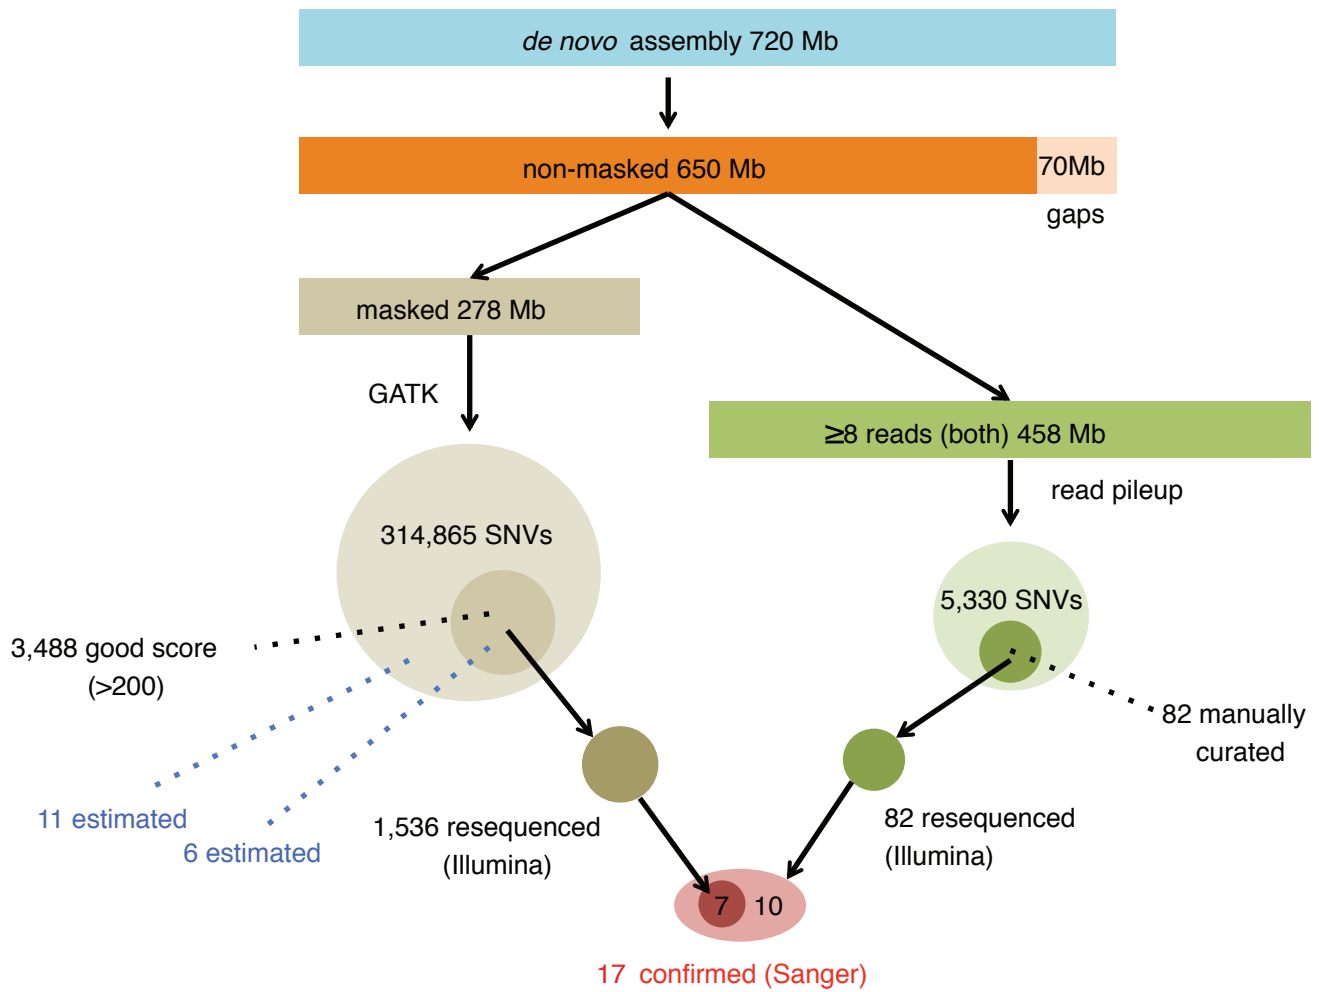

Supplementary Figure 4 | Flowchart of SNV identification methods.



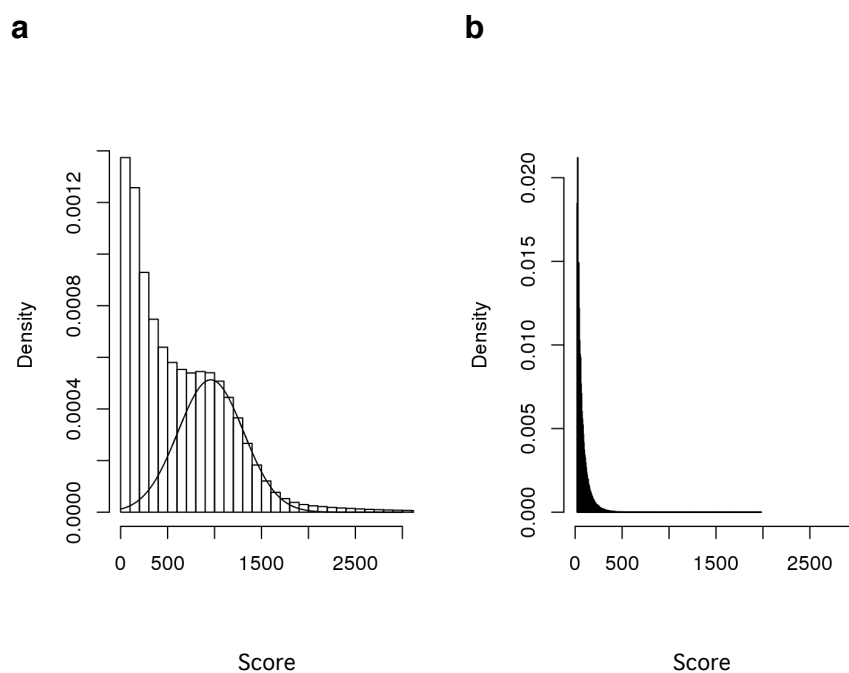

**Supplementary Figure 5 | Distribution of variants. a**, Distribution of the confidence scores of the 1'832'554 heterozygous sites common to both samples 0 and 66. **b**, Distribution of the confidence scores of 165'489 heterozygous sites in sample 66 that are homozygous in sample 0.

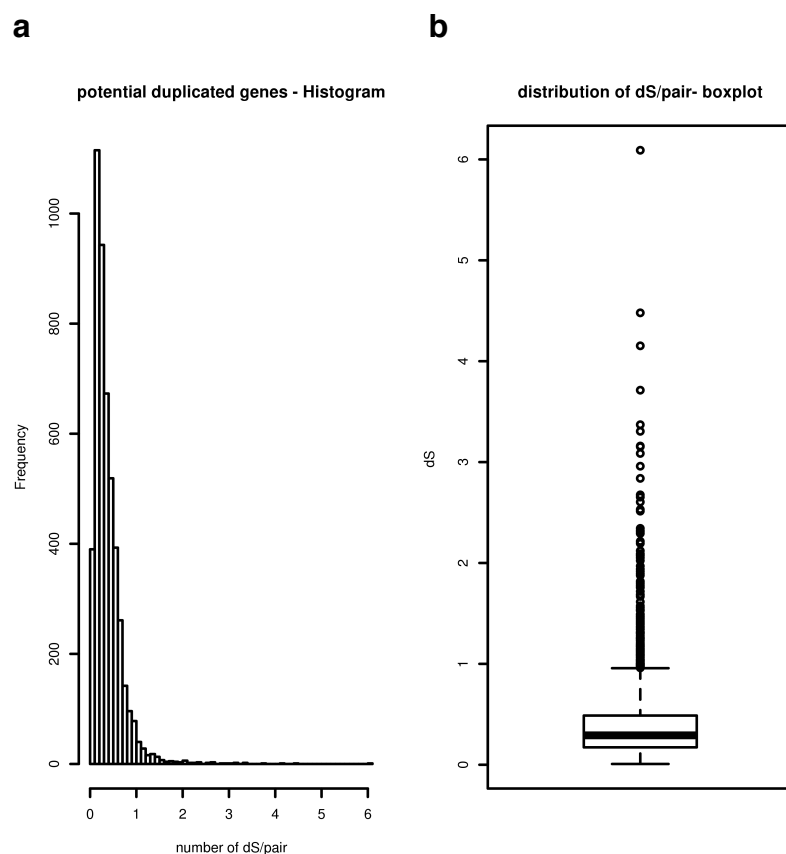

**Supplementary Figure 6 | Analysis of oak genome duplication.** **a**, Frequency plot and **b**, box plot showing the distribution of synonymous distances (dS) on a stringent set of 4,777 paralog pairs. This analysis was done with a threshold BLAST E-value  $<1e-10$  and by removing multigene families of more than 20 members.

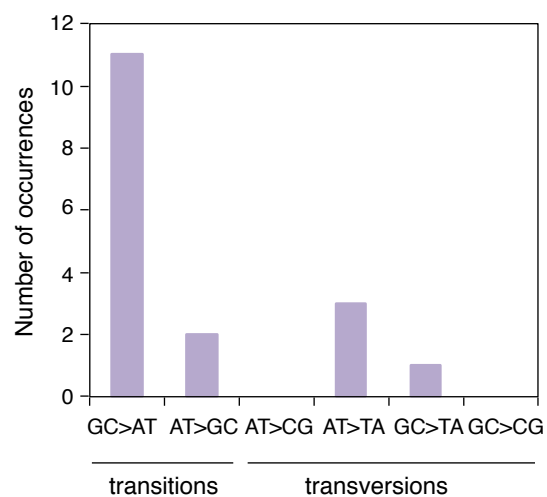

**Supplementary Figure 7 | Spectrum of somatic mutations between two Napoleon Oak genomes.**  
The type of substitution for 17 confirmed oak SNVs is shown.

### Supplementary Table 1: *Quercus robur* genome statistics.

---

| <b>Genome</b>                                                |             |
|--------------------------------------------------------------|-------------|
| Total genome length (bp)                                     | 719,779,348 |
| Number of scaffolds                                          | 85,557      |
| Maximum scaffold length (bp)                                 | 317,245     |
| NG50 based on 740 Mbp (bp)                                   | 17,014      |
| Gaps (%)                                                     | 9.52        |
| Masked (%)                                                   | 39.84       |
| <b>Genes</b>                                                 |             |
| Average length (bp)                                          | 2,360       |
| Maximum length (bp)                                          | 47,221      |
| Average intron length (bp)                                   | 740         |
| Average exon length (bp)                                     | 232         |
| <b>Proteome</b>                                              |             |
| Total predicted proteins                                     | 49,444      |
| Full proteins                                                | 44,096      |
| Partial proteins                                             | 5,348       |
| Nb proteins with orthologous in <i>Glycine max</i>           | 39,656      |
| Nb orthologous in <i>Glycine max</i> + functional annotation | 16,323      |
| Nb orthologous in <i>Glycine max</i> + function via ATH      | 23,333      |

---

**Supplementary Table 2. SNVs in the Napoleon Oak.**

| SNV      | Contig              | Lower branch genome (0) | Upper branch genome (66) | Context              | Position   |
|----------|---------------------|-------------------------|--------------------------|----------------------|------------|
| SNV1     | Contig12293_20040   | TCTGA                   | TCT/CGA                  |                      | Exon (R→G) |
| SNV2     | Contig8610_5366     | AACAG                   | AAC/TAG                  | CpNG                 | Intron     |
| SNV3     | Contig17717_5512    | ACCAT                   | ACC/TAT                  | dipyrimidine         | Non coding |
| SNV4     | Contig19224_2528    | TACAT                   | TAC/TAT                  |                      | Non coding |
| SNV5     | Contig3344_66711    | AACGC                   | AAC/TGC                  | CpG                  | Non coding |
| SNV6     | Contig420_15205     | CTTGA                   | CTT/AGA                  |                      | Non coding |
| SNV7     | Contig46021_5283    | TCCTA                   | TCC/TTA                  | dipyrimidine         | Non coding |
| SNV8     | Contig4756_544      | AAGGT                   | AAG/AGT                  | dipyrimidine         | Intron     |
| SNV9     | Contig61424_5311    | ATTTG                   | ATT/ATG                  |                      | Non coding |
| SNV10    | Contig79811_6871    | AACAA                   | AAC/TAA                  |                      | Non coding |
| SNV11,12 | Contig33320_1101-13 | ACC/ATTTACGAGGCTA/TTT   | ACCTTTACGAGGCTATT        |                      | Non coding |
| SNV13    | Contig1217_8596     | TCG/AGG                 | TCGGG                    | dipyrimidine         | Non coding |
| SNV14    | Contig15467_11236   | AGG/AAT                 | AGGAT                    | dipyrimidine         | Intron     |
| SNV15    | Contig4515_9475     | GTC/TGT                 | GTCTGT                   | CpG,<br>dipyrimidine | Intron     |
| SNV16    | Contig28929_3009    | TTT/CGG                 | TTTGG                    |                      | Non coding |
| SNV17    | Contig32076_9167    | TGG/AGC                 | TGGGC                    | dipyrimidine         | Non coding |

Mutated bases are shown in red. Homozygous sites generate heterozygote sites.

### Supplementary Table 3. Orthology and duplication of DNA repair genes in oak and peach trees.

| Branch of the phylogeny                    | DNA repair genes |       |         | All genes  |        |         |
|--------------------------------------------|------------------|-------|---------|------------|--------|---------|
|                                            | duplicated       | total | % total | duplicated | total  | % total |
| <i>Quercus robur</i>                       | 0                | 228   | 0.0     | 258        | 10,199 | 3.5     |
| <i>Prunus persica</i>                      | 5                | 228   | 2.2     | 860        | 16,004 | 5.4     |
| <i>Quercus - Prunus</i><br>common ancestor | 1                | 228   | 0.4     | 523        | 8,474  | 6.2     |

All gene counts are for *Arabidopsis thaliana* orthologs; the number of "all genes" varies according to the number of orthologs detected for each set (i.e., from *Quercus robur*, from *Prunus persica*, or shared). All orthology detection and lineage-specific duplication calls are from OMA (see Experimental Procedures)

#### Supplementary Table 4. List of primers used for genotyping and Sanger sequencing

| SNV   | Contig            | Forward primer (5'-3') | Reverse primer (5'-3') |
|-------|-------------------|------------------------|------------------------|
| SNV1  | Contig12293_20040 | CCCTTGCCTGTAAGGAATCA   | TGCTATGCTTGGAAAAACCA   |
| SNV2  | Contig8610_5366   | GGCTGAACAAAGTTGAGTGGA  | TGTAAGCCCTCATCCCATGT   |
| SNV3  | Contig17717_5512  | CAACGAACTCACAGGACGTG   | AGCTTTGTCATCAGCCTCAG   |
| SNV4  | Contig19224_2528  | CTTTTTACAATGCCCCCAGA   | AAATGCAAGACATCGCTCCT   |
| SNV5  | Contig3344_66711  | AGAAAATGTGGACGCTGACC   | GCCGTATTGTTGTTGGGAAC   |
| SNV6  | Contig420_15205   | CGAGCATTGATCGAATACCA   | TGTGGCCATCCAAGATTAAA   |
| SNV7  | Contig46021_5283  | AACTGTCGAGCATTGGGTTT   | GGATTGCCAAAAGGAGGAAT   |
| SNV8  | Contig4756_544    | GGCAGGCAGAGACACAAACT   | GGAGAGTGGTGGGAATTTGA   |
| SNV9  | Contig61424_5311  | GCATCGACCAACTGGTTTTT   | CAGTTGCCCTCCATTTGATT   |
| SNV10 | Contig79811_6871  | CCCAAAAAGTTCCAGCTCAG   | ATGACGACTAAGGGCGTGTT   |
| SNV11 | Contig33320_1101  | GATTGGATGTGGGATCCTTG   | GGCAATTCACTACCCTTGG    |
| SNV12 | Contig33320_1113  | GATTGGATGTGGGATCCTTG   | GGCAATTCACTACCCTTGG    |
| SNV13 | Contig1217_8596   | CGACAGATGCTGCTATCGAG   | AACGATGAAGATCAGGAAGCA  |
| SNV14 | Contig15467_11236 | TCTGTGATCCACGTGTTGGT   | GGCGCCTAAACAAGTCTCAG   |
| SNV15 | Contig4515_9475   | TTGGCCTATATTTGAAACCAAT | AGTCGGCAAATCCAAAATTC   |
| SNV16 | Contig28929_3009  | AGCACCCGATAAGCTCAAAA   | GTCTTCAGCTCTGCCACCTC   |
| SNV17 | Contig32076_9167  | TTCATTGCAATTTCCACAGG   | TCATCATCCAAGCCTGACG    |

## 1 **Low rate of somatic mutations in a long-lived oak tree**

2 Sarkar *et al.*

3

### 4 **Supplementary Methods**

5 **Genome assembly.** For sample 0, a paired-end library generated 2 x 151,194,704 reads  
6 (coverage 40X) and a mate-pair library generated 2 x 107,264,298 reads (coverage 29X). For  
7 sample 66, a paired-end library generated 2 x 158,505,474 reads (coverage 42X) and a mate-  
8 pair library generated 2 x 124,076,608 reads (coverage 33X). These reads were filtered and  
9 trimmed prior assembly using Trimmomatic (v0.3; leading:3, trailing:3, slidingwindow:4:15,  
10 minlen:36, custom adapter library)<sup>23</sup> and assembled using SOAPdenovo2 (v2.04.240, kmer  
11 49)<sup>24</sup>. In a second step the assembly was scaffolded with mate-pairs using the same program.  
12 The assembly was further scaffolded with long single-molecule PacBio reads (22 SMRT  
13 cells, XL-C2 and P4-C2 chemistry, coverage 19X) and the program AHA  
14 (<http://www.pacb.com/products-and-services/analytical-software/smrt-analysis/>; SMRTPipe  
15 2.0.1 manually driven, settings (5,2,50,70), no gap-filling). Assembled sequences <1000 bp  
16 were removed to facilitate further analysis. The genome was extended with all paired-end  
17 libraries and SSPACE<sup>25</sup> (v2.0, -x = 1,z = 0,-k = 5,-a = 0.7,-n = 15,-T = 20,-p = 0,-o = 20,-t =  
18 0,-m = 32,-r = 0.9) and gaps were filled using Gapfiller (v1.10, all paired-end libraries)<sup>26</sup>.

19 We screened the paired-end libraries for potential non-oak sequences using metaphlan  
20 (v1.7.7)<sup>27</sup>. Based on metaphlan results, reference genomes were obtained for the non-oak  
21 genomes and the oak scaffolds were filtered against these using blast (ncbi-blast v2.28, >90%  
22 sequence identity and E-value <1e-5). The genome was next scaffolded again using the  
23 PacBio reads and PBJelly (v14.1.14)<sup>28</sup>. If not further specified, programs were used with their  
24 standard settings.

25



26 **Gene prediction and annotation.** Repetitive elements were analysed by first generating a  
27 specific repeat model using RepeatModeler (<http://www.repeatmasker.org>; v1.0.7, -engine  
28 wublast). Repetitive regions in the genome were subsequently masked with the obtained  
29 model using RepeatMasker (<http://www.repeatmasker.org>; v4.0.3). Genes were predicted by  
30 generating a *Q. robur* specific gene prediction model for Augustus (v3.0.1)<sup>29</sup>, as described in  
31 Tran et al.<sup>30</sup>. Instead of RNAseq reads, we used the UniProtKB reference proteome of  
32 *Glycine max* mapped with the splice aware mapper exonerate (V2.2.0, model  
33 protein2genome, geneseed 250 --minintron 20, --maxintron 20000)<sup>31</sup>. Using this model we  
34 predicted genes and subsequently their encoded proteins for the hard-masked version of the  
35 genome (settings: no hints, no UTR predicted, no alternative transcripts). Non-coding  
36 elements were annotated using RFAM (v1.5; infernal 1.0.2; blast 2.2.26; hmmer 3.1b1)<sup>32</sup> in  
37 the genome with coding regions masked but repetitive elements unmasked. The predicted  
38 proteome was annotated based on homology using the FASTA toolkit  
39 (<http://www.ebi.ac.uk/Tools/sss/fasta/>; v36.3.5e) as following: proteins from the *Glycine max*  
40 proteome were first mapped with ggsearch (-b 1 -d 0 -E 1e-5 -m 8 -T 10); proteins that did  
41 not map were mapped in a next step with glsearch (-b 1 -d 0 -E 1e-5 -m 8 -T 10) and finally  
42 the rest with ssearch (-b 1 -d 0 -E 1e-5 -m 8 -T 10). The functional protein annotation was  
43 overtaken from *Glycine max*. For proteins with unknown function in *Glycine max*, we  
44 extended the annotation using the OMA database ([www.omabrowser.org](http://www.omabrowser.org)) and orthologous  
45 proteins from *Arabidopsis*. PFAM<sup>33</sup> was used additionally to obtain functional domain  
46 annotations for the proteome and the concatenated proteome annotation was transferred onto  
47 the oak genome.

48

49 **PCR-seq.** A modification of the published RT-PCR-seq method<sup>34</sup> was used. Briefly, pairs of  
50 primers for 50-150 bp amplicons containing the targeted sequence were designed using  
51 Primer3. Touchdown PCR amplification was performed in a final volume of 12.5 ml with

52 JumpStart REDTaq ReadyMix (Sigma-Aldrich), a primer concentration of 0.4 mM and 2 ng  
53 of gDNA per reaction in 384-well plates. Equal volumes of PCR products were pooled for  
54 each DNA template (sample 0 and 66). One ml of each pool was then purified with the  
55 QIAquick PCR Purification Kit (Qiagen) following the manufacturer's instructions. The  
56 KAPA LTP Library Preparation Kit (Kapa Biosystems) was used, starting with 500 ng of  
57 purified PCR products, to create a library compatible with an Illumina sequencing platform.  
58 Clean-ups between enzymatic steps were performed with Nucleospin PCR Clean-up columns  
59 (Macherey-Nagel). After ligation of pentabase adapters, libraries were run on a 2 % agarose  
60 gel and extracted using the MinElute Gel Extraction kit (Qiagen). Libraries were sequenced  
61 on HiSeq 2000 after six cycles of amplification (Lausanne Genomic Technologies Facility).  
62 Amplicon reads were aligned, with no mismatches allowed, to a compendium of the expected  
63 amplicons that bore the reference allele, the alternate allele identified in the heterozygote  
64 sample, as well as the remaining two nucleotides at the variable position; this allowed an  
65 unbiased estimation of the error rate generated by the sequencing itself. As this method might  
66 have missed *bona fide* changes between the two sampled branches that present other  
67 heterozygous sites close by, we also aligned amplicon sequencing reads directly to the  
68 reference genome, with mismatches allowed.

69

70 **Estimation of the possible missed SNVs.** About half of the putative variable sites with  
71 confidence scores  $\geq 200$  were assessed experimentally by PCR-seq (1,536 out of 3,488 sites).  
72 Given the confidence scores of the tested sites, we estimated that we missed fewer than 6  
73 SNVs in the sites not evaluated by PCR-seq. We then evaluated the number of true positives  
74 missed within candidates with confidence scores  $< 200$  in the list of sites that were  
75 heterozygous in only one sample. We fitted a mixture of two distributions, including a  
76 normal distribution that should fit the correct calls, modelled on the 1,832,554 sites that were  
77 predicted to be heterozygous in both samples (Supplementary Figure 5a). Applying this

78 distribution to the data for sites that are homozygous on sample 0 and heterozygous on  
79 sample 66 (case 1, Supplementary Figure 5b), we find that the distribution of correct calls is  
80 insignificant compared to the rest. In details, when fitting this normal distribution to the data,  
81 the expected number of correct calls with a score  $< 200$  is 5.24. Extrapolating this calculation  
82 for sites that are heterozygous on sample 0 and homozygous on sample 66 (case 2), we  
83 estimate that we have missed fewer than 11 true SNVs for both cases. We thus estimate a  
84 total of 17 missed SNVs (6 with a score  $\geq 200$  and 11 with a score  $< 200$ ). Note that we did not  
85 assess the presence of larger somatic changes such as copy number variants, small indels, and  
86 transposition events.

87

88 **Estimation of the false negative rate.** A few recent studies have tried to estimate the false  
89 negative rate of SNV calling for large genomes assembled with short read sequences<sup>10,35</sup>. The  
90 main method used in those studies was to introduce simulated SNVs into the data, and check  
91 how well they were recovered. This is not directly applicable to our approach, as we did not  
92 merely perform bioinformatics filtering, but also used a large PCR-seq screen to detect  
93 SNVs. The comparison of F2 / F4 genotypes is very promising, but cannot either be applied  
94 to our data<sup>10</sup>. It is notable that both approaches, in *Drosophila*<sup>35</sup> and in *Arabidopsis*<sup>10</sup>, found  
95 very low rates of false negatives, less than 2%. If this holds true for our data (which has  
96 higher mean read coverage), then our false negative rate cannot be so large as to challenge  
97 our main conclusions. Using this maximum rate of 2%, we can estimate the number of false  
98 negatives (FN) as:  $0.02 = FN / (FN + TP)$ , where TP equals 34 estimated true SNVs. This  
99 calculation gives 0.69, which suggests that we have only missed ~1 SNV.

100

101 **Whole-genome duplication.** Simple clustering based on homology, (i.e., clustering the  
102 predicted proteins by identity, CD-HIT, min 90% similarity), retrieved 1,098 proteins that  
103 have a  $>90\%$  identity to another protein, which is not suggestive of recent whole genome

104 duplication. Whole genome duplication should lead to an excess of relatively old paralogs,  
105 whereas small-scale duplicates are expected to be enriched in very recent paralogs. This can  
106 be estimated from the distribution of synonymous distances (dS)<sup>36,37</sup>. We computed the dS on  
107 a stringent set of 4,777 paralog pairs with BLAST E-value <1e-10, removing large multigene  
108 families (more than 20 members). The distribution of dS values is clearly unimodal, with an  
109 excess of low dS values (i.e., young paralogs, Supplementary Figure 6). This also does not  
110 support a recent whole genome duplication in the oak lineage.

111 To address the possibility of a more ancient duplication event, we compared our oak  
112 genome reference with itself using “BLAST all versus all” as suggested in Panchy et al.<sup>38</sup>,  
113 (i.e., similarity  $\geq 30\%$ , match length  $\geq 150$ AA and E-value  $\leq 1e-5$ ). Following this procedure  
114 we have 49,444 proteins, of which 3,650 are duplicated (7.4%), 2,070 are triplicated (4.1%)  
115 and 23.7% are present in more copies with diminishing frequency. In summary, a total of  
116 17,474 oak proteins out of 49,444 appear to be duplicated (35%), which is less than that  
117 reported for closely related species (e.g. *Medicago sativa* has about 50,000 genes of which  
118 >75% are duplicated, according to Panchy et al.<sup>38</sup>). We then assessed whether the similarity  
119 identified above was local, properties of similar domains, or extended along the entire  
120 protein, indicative of duplicated proteins. We found only 973 oak proteins that have  
121 duplications extending over their entire lengths. In summary, it is possible that the oak  
122 genome underwent duplication, as suggested by Panchy et al.<sup>38</sup>, but this event appears to be  
123 rather old, as we have very few (<3%) duplicated genes with very high similarity (>90%) and  
124 no second peak in the dS distribution (Supplementary Figure 6). It seems unlikely that such a  
125 duplication event should compromise the identification of *bona fide* variants. Note that if the  
126 duplication would have hindered the capacity to detect these variants, they would not be  
127 found in nested sectors of the tree but rather in all 26 samples assessed.

128

129 **Analysis of DNA repair genes.** Orthologs between *Arabidopsis*, *Prunus persica* (peach) and  
130 *Q. robur* were called using the OMA database<sup>39</sup>. One-to-many orthologs, e.g., between  
131 *Arabidopsis* and *Q. robur*, represent duplication in the oak lineage since the divergence from  
132 *Arabidopsis*; they are also known as in-paralogs of oak. We classified these in-paralogs  
133 according to whether the duplication was shared by *P. persica* and *Q. robur* (i.e., one copy in  
134 *Arabidopsis* relative to several copies in both the peach and oak genomes), or whether it was  
135 peach- or oak-specific (i.e., one copy in *Arabidopsis* and peach, relative to several copies in  
136 oak). The number of duplicates was reported as the number of genes that could be called  
137 duplicate (i.e., the number of orthologs between each tree genome and *Arabidopsis*,  
138 Supplementary Table 5). We then manually compiled a list of *Arabidopsis* genes involved in  
139 DNA repair from SwissProt/UniProtKB annotations (Supplementary Table 6). We then  
140 counted specifically the number of duplicates for genes involved in DNA repair and reported  
141 this as the number of orthologs associated with this function (Supplementary Table 3 and 7).

142

### 143 **Supplementary Discussion**

144 We found that G:C→A:T transitions were the most frequent class of SNVs observed in the  
145 Napoleon Oak (Supplementary Figure 7). Ultraviolet (UV) light causes G:C→A:T transitions  
146 at dipyrimidine sites in plants<sup>40</sup>. Among the 11 G:C→A:T transitions that we observed, seven  
147 were in a dipyrimidine context (Supplementary Table 2). In addition, spontaneous  
148 deamination of methylated cytosine leads to thymine change at CpG or CpNG sites [22].  
149 However, there were only three G:C→A:T transitions in such a context (Supplementary  
150 Table 2). It thus seems plausible that UV light may have caused most of the G:C→A:T  
151 transitions we observed, although other factors, such as cytosine deamination and replication  
152 errors, may account for other SNVs. Although the oak lineages sampled have not been  
153 separated by any meiosis events, which in yeast was found to elevate the generational  
154 mutation rate<sup>41</sup>, they have been exposed to the natural environment, which in *Arabidopsis* is

155 known to significantly enhance mutation rate when compared to a controlled lab  
156 environment<sup>42</sup>.

157 Our results throw new light on explanations proposed for differences in the  
158 distribution of mating systems between short- and long-lived plants. While many annuals and  
159 short-lived plants have undergone evolutionary transitions from outcrossing to selfing<sup>43</sup>, often  
160 involving a loss of self-incompatibility systems<sup>44</sup>, long-lived woody species are more likely  
161 to be fully outcrossing<sup>45</sup>, including oaks<sup>46</sup>. Theoretical analysis indicates that a high somatic  
162 mutation rate could account for this difference, because somatic mutations would contribute  
163 to the genetic load of the population and thus to inbreeding depression, disfavoured self-  
164 fertilization<sup>1</sup>. Inbreeding depression is indeed higher in long-lived woody species than  
165 annuals<sup>47</sup>, and the observation of higher inbreeding depression caused by within-branch than  
166 between-branch selfing points to the accumulation of different deleterious somatic mutations  
167 in different sectors of the plant<sup>3</sup>. However, our finding now challenges the notion that the  
168 breeding system of long-lived trees is constrained by a high rate of somatic mutations.

169 The results of our study, in conjunction with those of Burian et al.<sup>14</sup>, have important  
170 implications for how we should view one of the most fundamental ways in which plants  
171 differ from animals – their absence of a germline. In oak, iterative growth of axillary  
172 meristems produces terminal branches that carry stem cells. As in other plants, favourable  
173 conditions induce stem cells to produce floral buds and ultimately the gametes of the next  
174 generation. These stem cells are functionally analogous to germ cells in metazoans and result  
175 from a limited number of divisions that prevent an accumulation of replicative errors.

176

## 177 **References**

- 178 23. Bolger, A.M., Lohse, M. & Usadel, B. Trimmomatic: A flexible trimmer for Illumina  
179 Sequence Data. *Bioinformatics* **30**, 2114-2120 (2014).
- 180 24. Luo, R. et al. SOAPdenovo2: an empirically improved memory-efficient short-read de  
181 novo assembler. *GigaScience* **1**, 18 (2012).
- 182 25. Boetzer, M., Henkel, C.V., Jansen, H.J., Butler, D. & Pirovano, W. Scaffolding pre-  
183 assembled contigs using SSPACE. *Bioinformatics* **27**, 578–579 (2011).

- 184 26. Boetzer, M. & Pirovano, W. Toward almost closed genomes with GapFiller. *Genome*  
185 *Biol.* **13**, R56 (2012).
- 186 27. Segata, N. *et al.* Metagenomic microbial community profiling using unique clade-  
187 specific marker genes. *Nature Methods* **9**, 811-814 (2012).
- 188 28. English, A.C. *et al.* Mind the gap: Upgrading genomes with Pacific Biosciences RS  
189 Long-Read Sequencing Technology. *PLoS One* **7**, 11 (2012).
- 190 29. Stanke, M., Steinkamp, R., Waack, S. & Morgenstern, B. AUGUSTUS: a web server  
191 for gene finding in eukaryotes. *Nucl. Acids Res.* **32**, W309-312 (2004).
- 192 30. Tran, V.D. *et al.* RNA sequencing-based genome reannotation of the dermatophyte  
193 *Arthroderma benhamiae* and characterization of its secretome and whole gene  
194 expression profile during infection. *mSystems* **1**, e00036-16 (2016).
- 195 31. Slater, G.S.C. & Birney, E. Automated generation of heuristics for biological sequence  
196 comparison. *BMC Bioinformatics* **6**, 31 (2005).
- 197 32. Gardner, P.P. *et al.* Rfam: updates to the RNA families database. *Nucl. Acids Res.* **37**,  
198 D136-140 (2009).
- 199 33. Sonnhammer, E.L.L., Eddy, S.R. & Durbin, R. Pfam: a comprehensive database of  
200 protein families based on seed alignments. *Proteins* **28**, 405-420 (1997).
- 201 34. Howald, C. *et al.* Combining RT-PCR-seq to catalog all genic elements encoded in the  
202 human genome. *Genome Res.* **22**, 1698-1710 (2012).
- 203 35. Keightley, P.D., Ness, R.B., Halligan, D.L. & Haddrill, P.R. Estimation of the  
204 spontaneous mutation rate per nucleotide site in a *Drosophila melanogaster* full-sib  
205 family. *Genetics* **196**, 313-320 (2014).
- 206 36. Lynch, M. & Conery, J.S. The evolutionary fate and consequences of duplicated genes.  
207 *Science* **290**, 1151-1155 (2000).
- 208 37. Vanneste, K., Van de Peer, Y. & Maere, S. Inference of genome duplications from age  
209 distributions revisited. *Mol. Biol. Evol.* **30**, 177-190 (2013).
- 210 38. Panchy, N., Lehti-Shiu, M. & Shiu, S.-H. Evolution of gene duplication in plants. *Plant*  
211 *Physiol.* **171**, 2294-2316 (2016).
- 212 39. Altenhoff, A.M. *et al.* The OMA orthology database in 2015: function predictions,  
213 better plant support, synteny view and other improvements. *Nucl. Acids Res.* **43**, D240-  
214 D249 (2015).
- 215 40. Britt, A.B. DNA damage and repair in plants. *Annu. Rev. Plant Physiol. Plant Mol.*  
216 *Biol.* **47**, 75-100 (1996).
- 217 41. Rattray, A., Santoyo, G., Shafer, B. & Strathern, J. N. Elevated mutation rate during  
218 meiosis in *Saccharomyces cerevisiae*. *PLoS Genet.* **11**, e1004910 (2015).
- 219 42. Rutter, M.T., Shaw, F.H. & Fenster, C.B. Spontaneous mutation parameters for  
220 *Arabidopsis thaliana* measured in the wild. *Evolution* **64**, 1825-1835 (2010).
- 221 43. Stebbins, G.L. Variation and evolution in plants. *Columbia University Press ed.*,  
222 (1950).
- 223 44. Goldberg, E.E. *et al.* Species selection maintains self-incompatibility. *Science* **330**,  
224 493-495 (2010).
- 225 45. Barrett, S.C.H., Harder, L.D. & Worley, A.C. The comparative biology of pollination  
226 and mating in flowering plants. *Phil. Tran. Royal Soc. London B: Biol. Sci.* **351**, 1271-  
227 1280 (1996).
- 228 46. Streiff, R. *et al.* Pollen dispersal inferred from paternity analysis in a mixed oak stand  
229 of *Quercus robur* L. and *Q. petraea* (Matt.) Liebl. *Mol. Ecol.* **8**, 831-841 (2009).
- 230 47. Goodwillie, C., Kalisz, S. & Eckert, C.E. The evolutionary enigma of mixed mating  
231 systems in plants: occurrence, theoretical explanations, and empirical evidence. *Annu.*  
232 *Rev. Ecol. Evo. Syst.* **36**, 47-79 (2005).
- 233
